# Supplementary material for: APOBEC mutagenesis is a common process in normal human small intestine
Source: PubMed Central journal article supplement (PMC9925384; doi:10.1038/s41588-022-01296-5), 2023-01-26

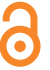

---

# **APOBEC mutagenesis is a common process in normal human small intestine**

---

In the format provided by the authors and unedited

## **SUPPLEMENTARY INFORMATION CONTENTS**

**Supplementary Information Fig. 1 | *APOBEC1/APOBEC3A/APOBEC3B* mRNA expression across normal tissues.**

**Supplementary Information Fig. 2 | Extended contexts of APOBEC signatures.**

**Supplementary Information Fig. 3 | HDP signatures from *de novo* extraction.**

**Supplementary Information Fig. 4 | Cosine similarity plot for HDP components and shortlisted PCAWG reference signatures.**

**Supplementary Information Figure 1 | APOBEC1/APOBEC3A/APOBEC3B mRNA expression across normal tissues.**

a-b. APOBEC1 bulk tissue gene expression data. Image credit: Human Protein Atlas (v21.proteinatlas.org. a-b: <https://v21.proteinatlas.org/ENSG00000111701-APOBEC1/tissue>, c-d: <https://v21.proteinatlas.org/ENSG00000128383-APOBEC3A/tissue>, e-f: <https://v21.proteinatlas.org/ENSG00000179750-APOBEC3B/tissue>). (a) APOBEC1 expression levels from the Human Protein Atlas project. Duodenum nTPM = 29, small intestine nTPM = 26, colon nTPM = 0.6. (b) APOBEC1 expression levels from GTEx. Small intestine nTPM = 11.9, colon nTPM = 1.1. c-d. APOBEC3A bulk tissue gene expression data. (c) APOBEC3A expression levels from The Human Protein Atlas project. Duodenum nTPM = 1.4, small intestine nTPM = 0.8, colon nTPM = 1.5. (d) APOBEC3A expression levels from GTEx. Small intestine nTPM = 0.8, colon nTPM = 1.4. e-f. APOBEC3B bulk tissue gene expression data. (e) APOBEC3B expression levels from The Human Protein Atlas project. Duodenum nTPM = 7.3, small intestine nTPM = 4.3, colon nTPM = 12.1. (f) APOBEC3B expression levels from GTEx. Small intestine nTPM = 2.1, colon nTPM = 6.0.

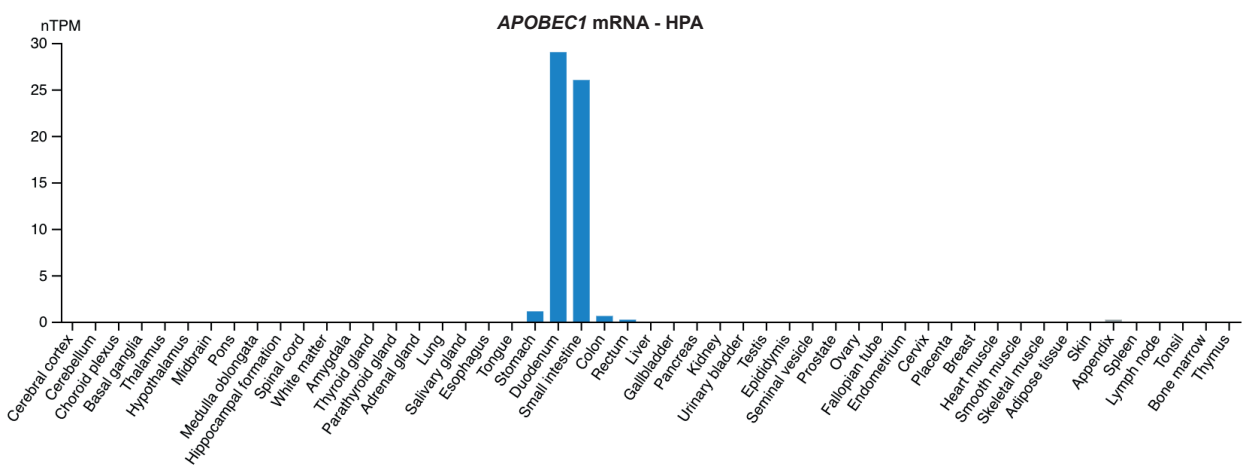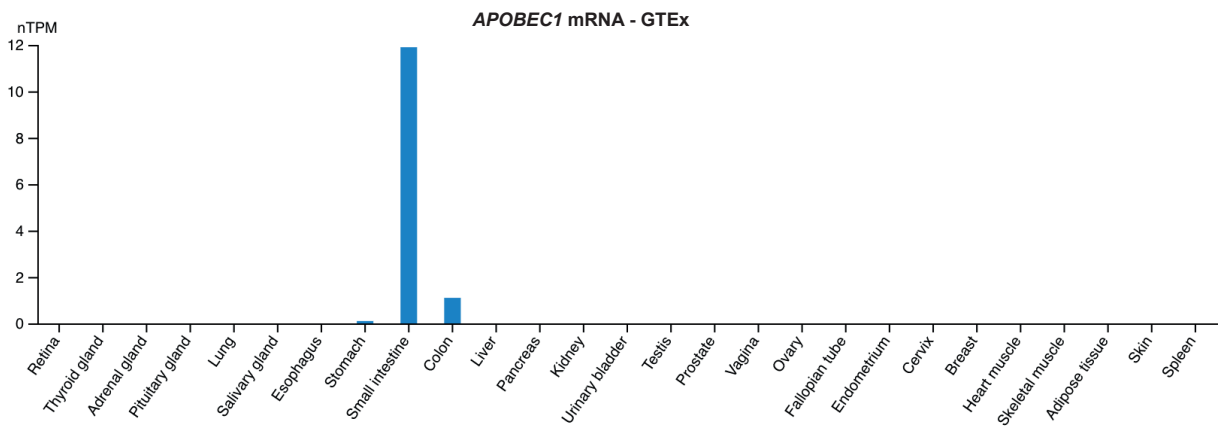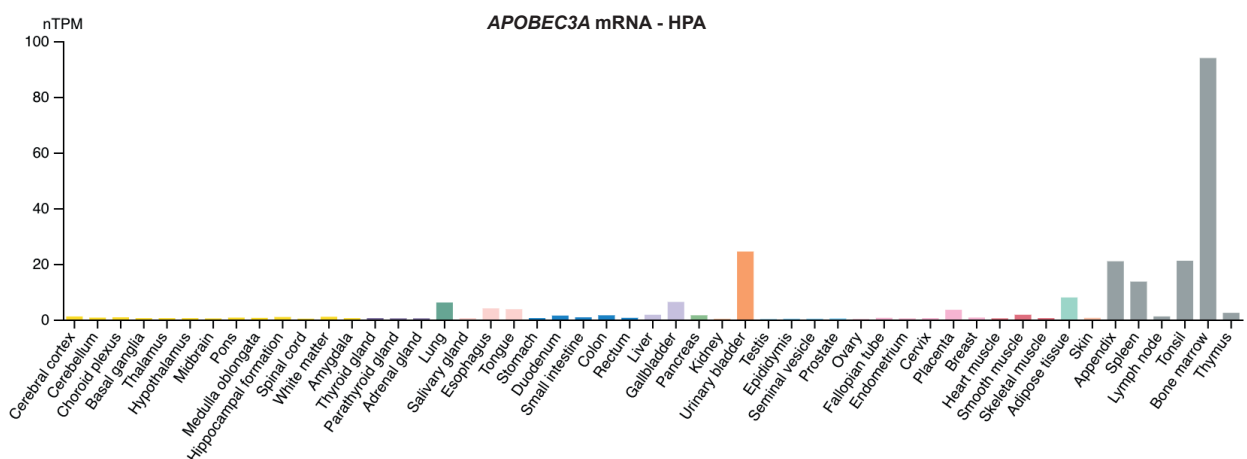

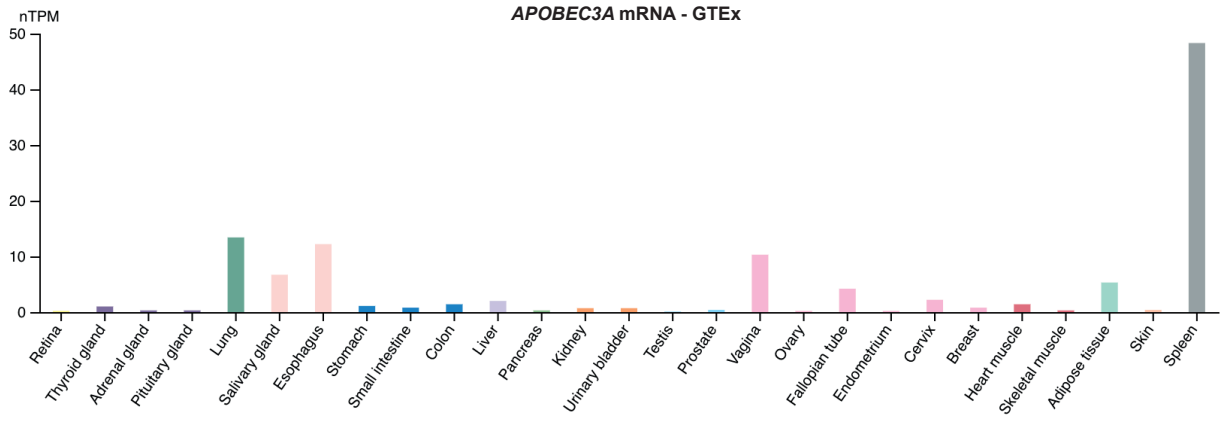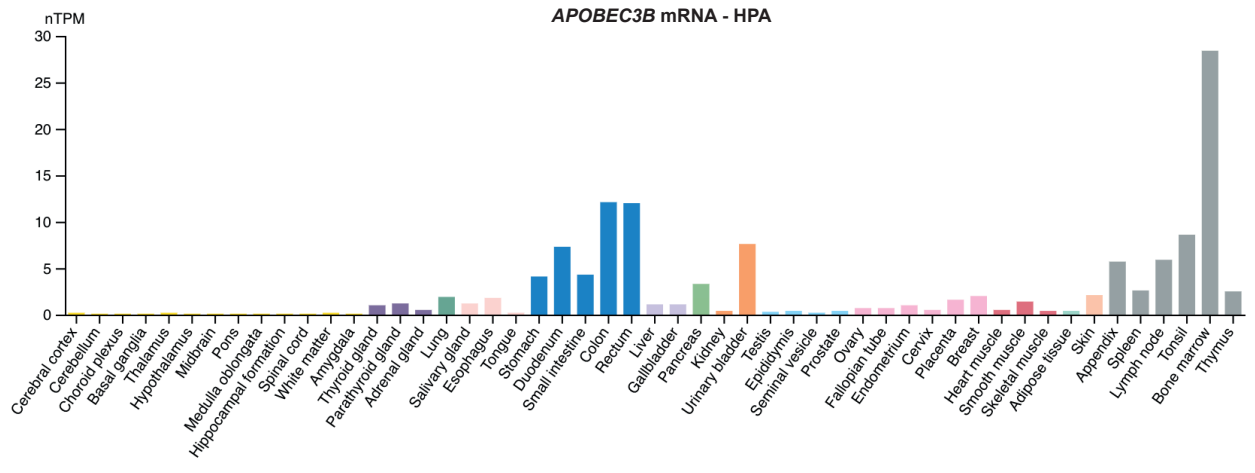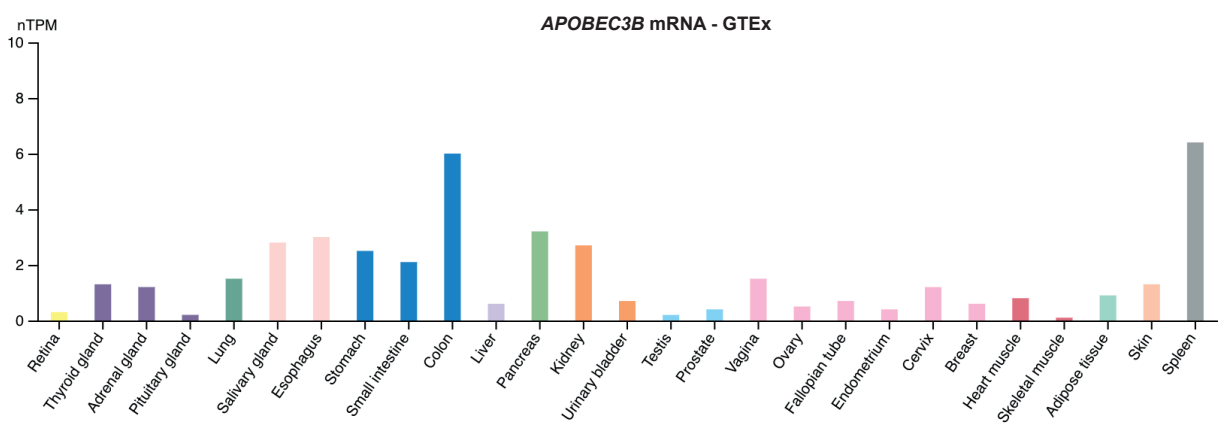

### Supplementary Information Figure 2 | Extended contexts of APOBEC signatures.

5bp context of the C>G/T part of the APOBEC signature from HDP *de novo* extraction. X axis represents 96 categories of trinucleotide context and y axis represents the proportion. The black lines indicate 95% confidence intervals. Trinucleotide contexts that are not statistically significant are shown in light grey. The peaks show C/T at the -2 position are favoured compared to A/G. Enrichment of pyrimidines instead of purines at -2 position indicate APOBEC3B is unlikely to be the major contributing enzyme, while APOBEC1/3A could not be excluded.

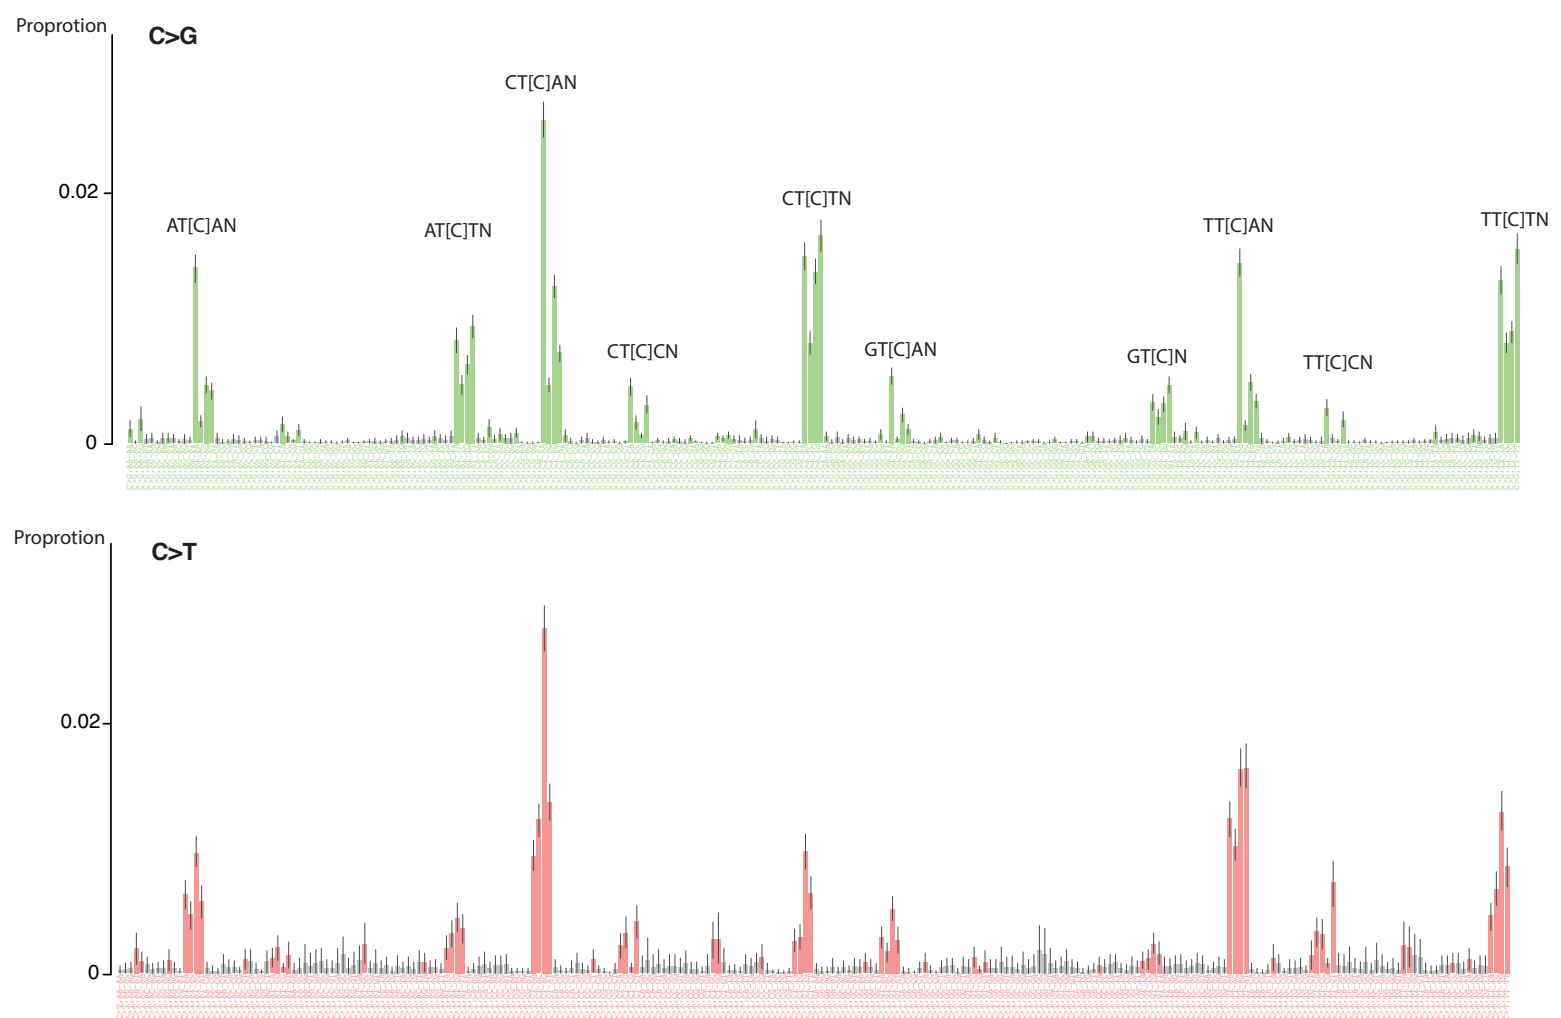

**Extended Data Fig. 9 | HDP signatures from *de novo* extraction.**

Mutational spectrum of nine HDP components from *de novo* extraction. X axis represents 96 categories of trinucleotide context and y axis represents the proportion. The black lines indicate 95% confidence intervals. Trinucleotide contexts that are not statistically significant are shown in light grey.

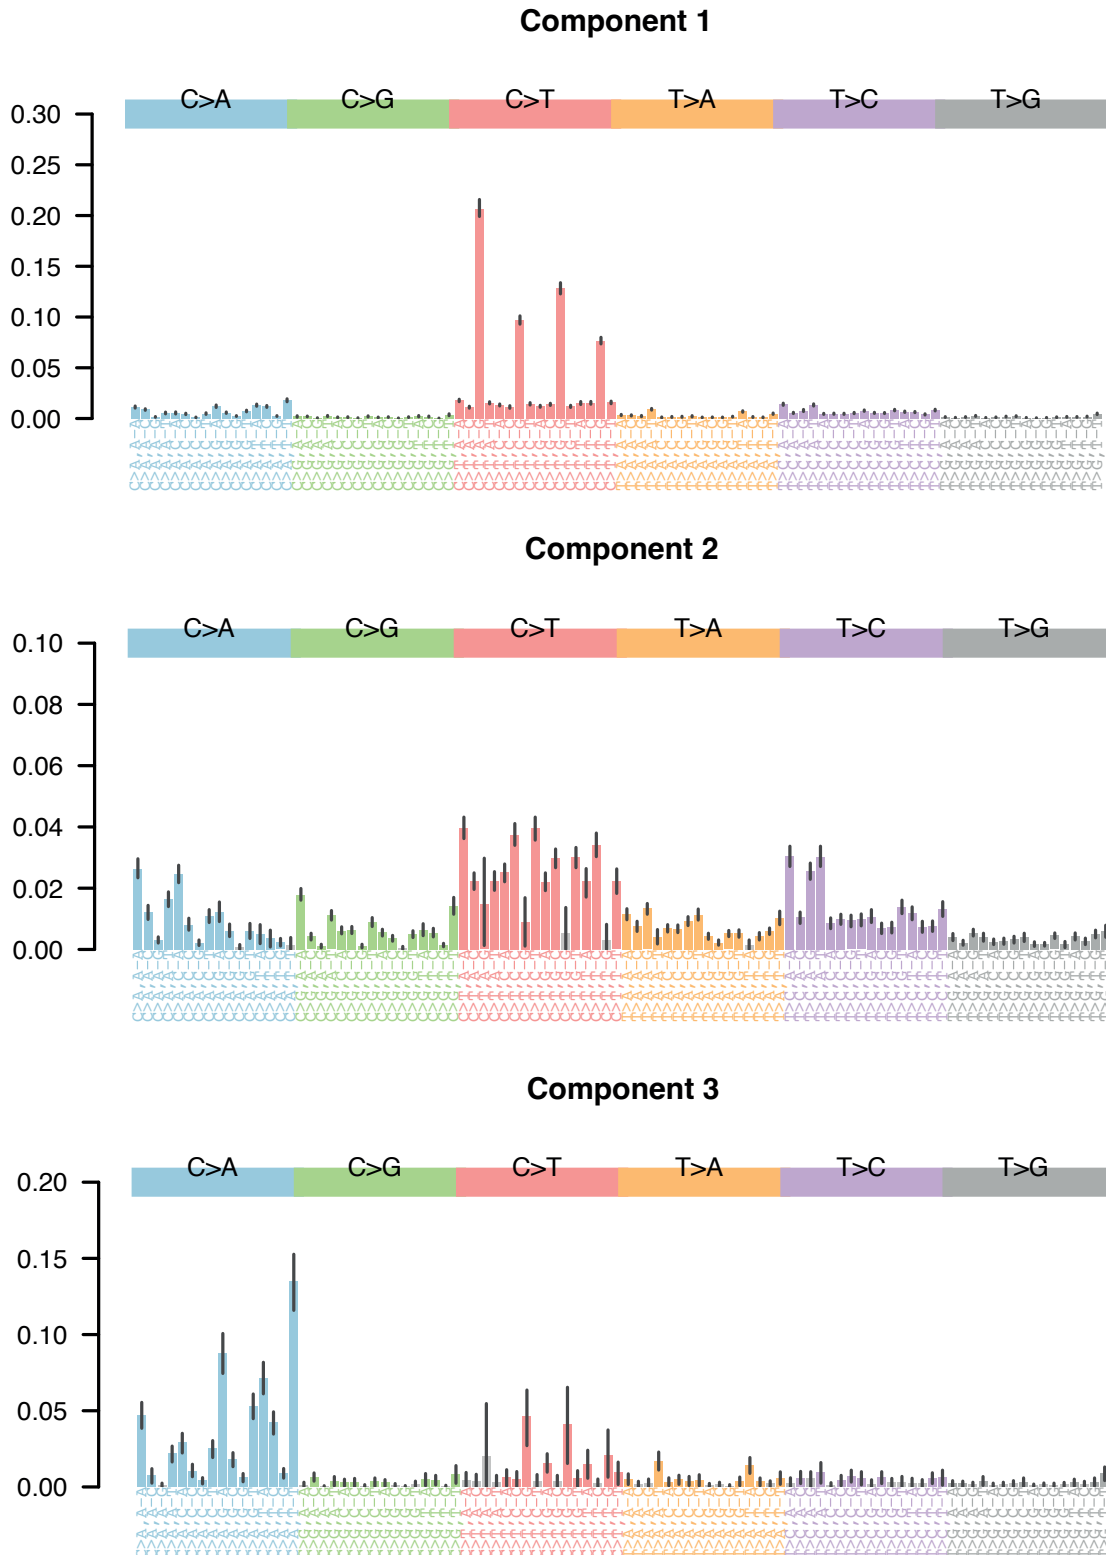

### Component 4

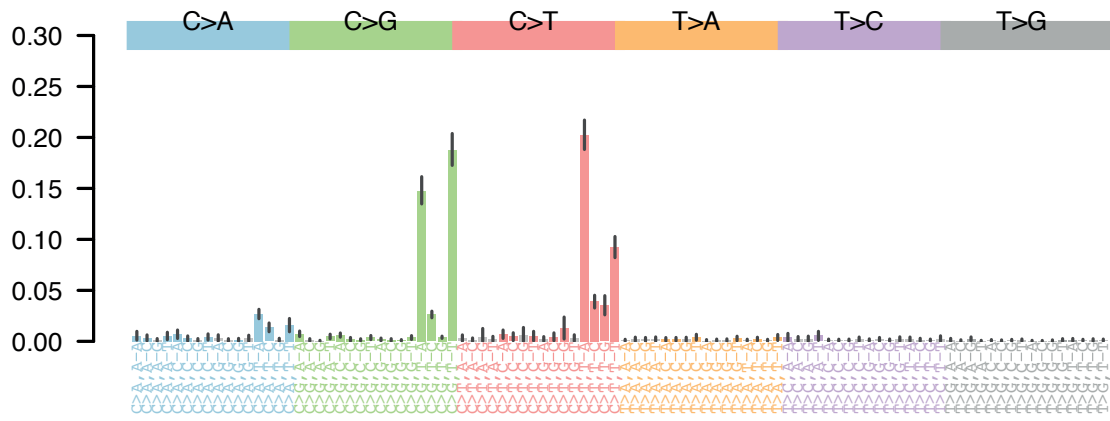

### Component 5

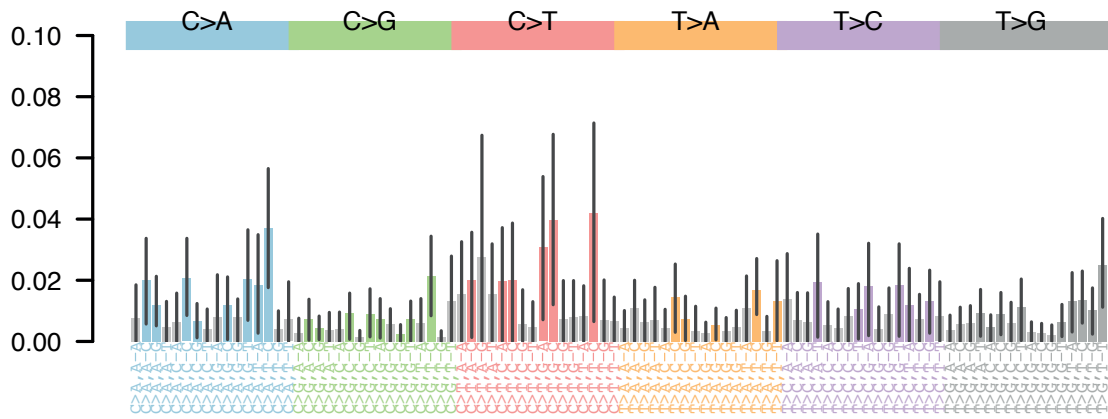

### Component 6

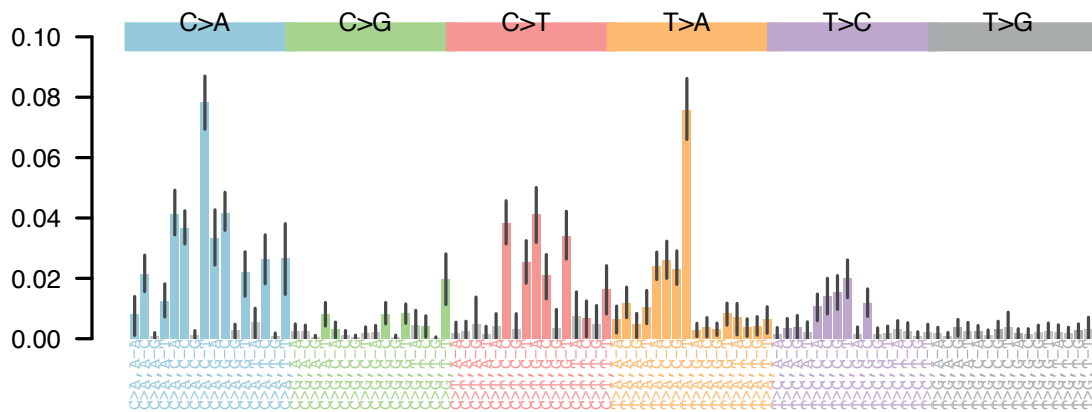

### Component 7

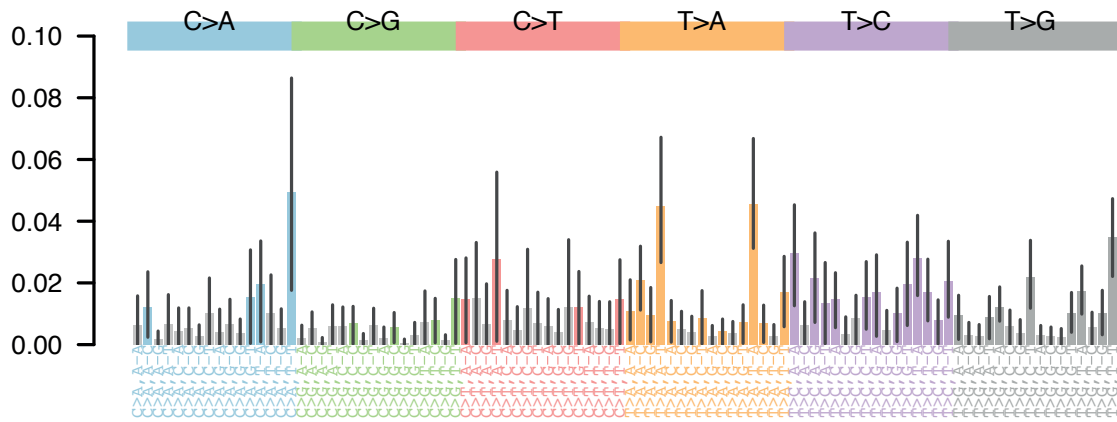

### Component 8

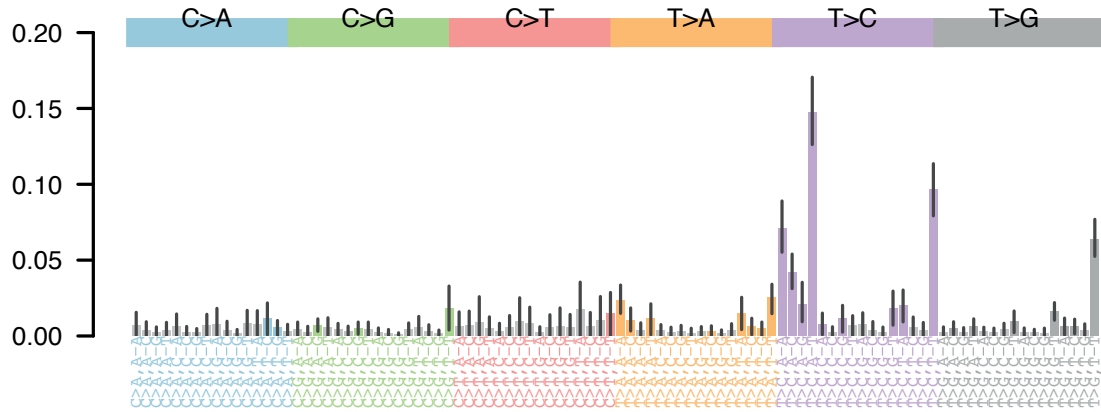

### Component 9

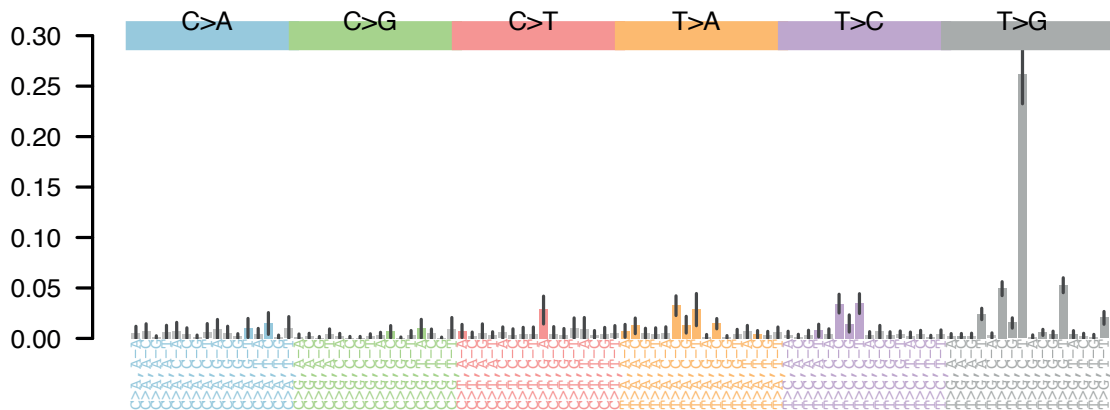



**Supplementary Information Figure 4 | Cosine similarity plot for HDP components and shortlisted PCAWG reference signatures.**

The APOBEC reference was made from the average spectrum of SBS2 and SBS13.

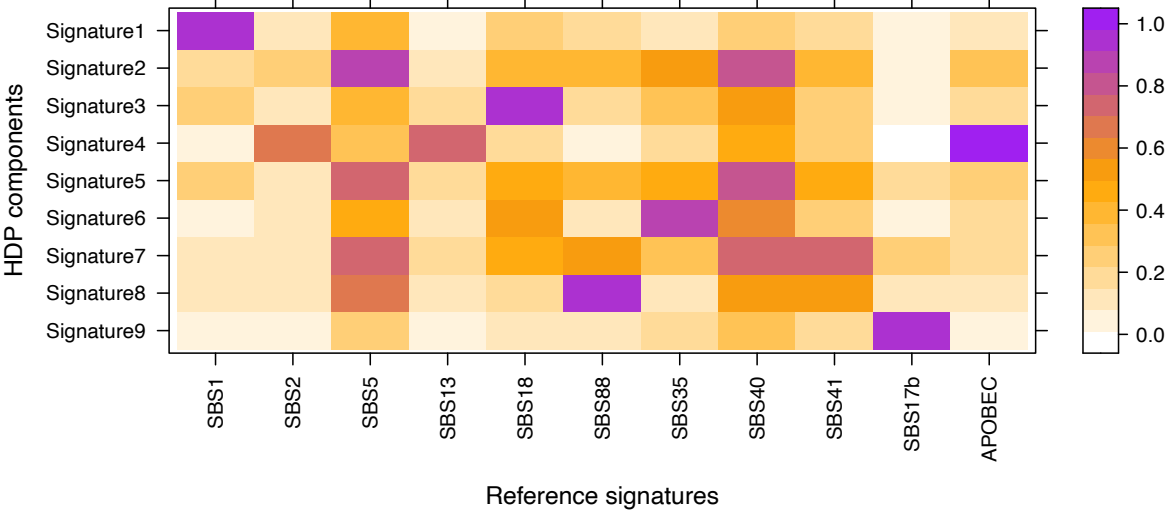

Supplement: 41588_2022_1296_MOESM1_ESM.pdf [file 41588_2022_1296_MOESM1_ESM.pdf]
